# Supplementary material for: Catalytic self-cleaning coatings for thermal oxidation of organic deposits on glass
Source: Royal Society of Chemistry journal article supplement (doi:10.1039/c3cy20874e), 2013-01-01
Supplement: c3cy20874e.pdf [file c3cy20874e.pdf]

## Electronic Supplementary Information

### Catalytic self-cleaning coatings for thermal oxidation of organic deposits on glass

J. Verhelst,<sup>a</sup> D. Decroupet<sup>b</sup> and D. De Vos<sup>\*a</sup>

<sup>a</sup> Centre for Surface Chemistry and Catalysis, KU Leuven, Kasteelpark Arenberg 23, 3001 Heverlee, Belgium. Fax: +32 16 321998; Tel: +32 16 321639; E-mail: [dirk.devos@biw.kuleuven.be](mailto:dirk.devos@biw.kuleuven.be)

<sup>b</sup> AGC Glass Europe, European Research and Development Centre, Rue de l'Aurore 2, 6040 Jumet, Belgium. Fax: +32 71 280360; Tel: +32 71 280403; E-Mail: [daniel.decroupet@eu.agc.com](mailto:daniel.decroupet@eu.agc.com)

UV-Vis absorption spectra of a blank glass slide and the manganese and mixed manganese-ceria oxide coatings are given in Fig. S 1. The absorbance of the fresh samples and the samples after the standardized test procedure (i.e. after applying the model contaminant and subsequent heat treatment) were measured. It can be noted that the absorbance values of both oxide coatings decreased after the test procedure, which indicates an enlightening. By contrast, the test procedure applied on the blank glass slide resulted in an increase of absorbance in the visible spectral region.

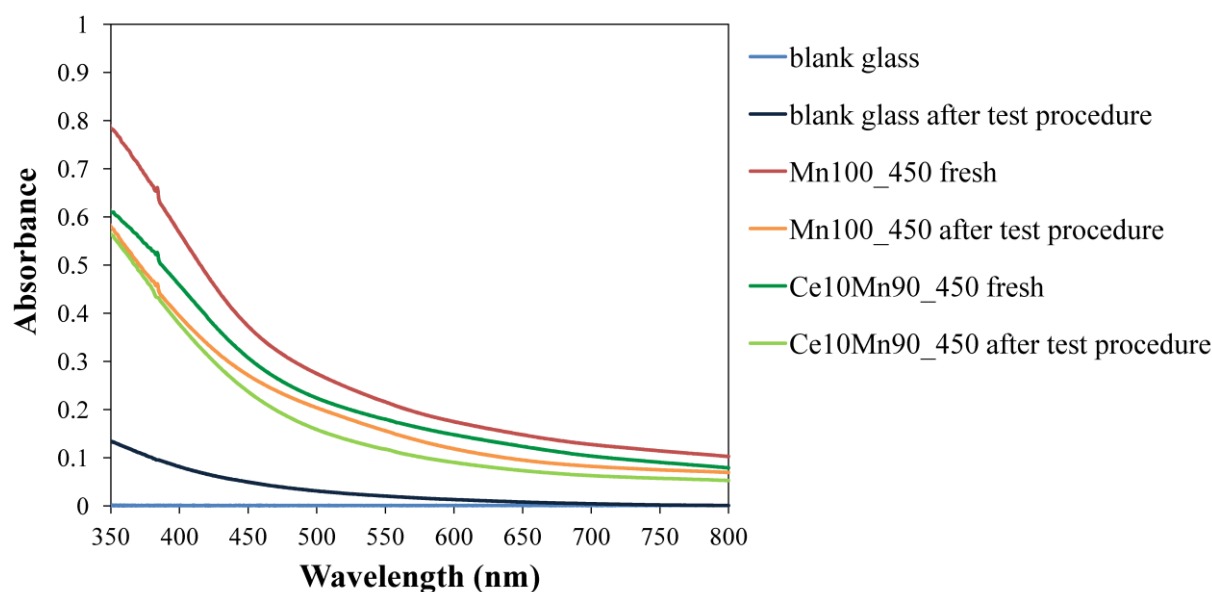

**Fig. S 1** UV-Vis absorption spectra of clear glass and Mn<sub>100</sub> and Ce<sub>10</sub>Mn<sub>90</sub> oxide coatings, before and after the test procedure.
